# Supplementary material for: The genetic tale of a recovering lion population (Panthera leo) in the Savé Valley region (Zimbabwe): A better understanding of the history and managing the future
Source: PLoS One. 2018 Feb 7;13(2):e0190369. doi: 10.1371/journal.pone.0190369 (PMC5802433; doi:10.1371/journal.pone.0190369)
Supplement: S2 Table — (XLSX) [file pone.0190369.s002.xlsx]

## Sheet: Sheet1
Table S2: Overview of microsatellite loci used in this study
Marker	Sequence ('5-'3)	Marker type	Chromosome	Allele length (bp)	Reference
FCA310 F	TTAATTGTATCCCAAGTGGTCA	microsatellite	C2	200-210	Menotti-Raymond et al 1999
FCA310 R	TAATGCTGCAATGTAGGGCA	microsatellite
FCA126 F	GCCCCTGATACCCTGAATG	microsatellite	B1	120-140	Menotti-Raymond et al 1999
FCA126 R	CTATCCTTGCTGGCTGAAGG	microsatellite
FCA506 F	AGAATGTTCTCTCCGCGTGT	microsatellite	F2	210-240	Menotti-Raymond et al 1999
FCA506 R	AATGACACCAAGCTGTTGTCC	microsatellite
FCA275 F	TTGGCTGCCCAGTTTTAGTT	microsatellite	B2	120-140	Menotti-Raymond et al 1999
FCA275 R	ACGAAGGGGCAGGACTATCT	microsatellite
FCA075 F	ATGCTAATCAGTGGCATTTGG	microsatellite	E2	110-140	Menotti-Raymond et al 1999
FCA075 R	GAACAAAAATTCCAGACGTGC	microsatellite
FCA069 F	AATCACTCATGCACGAATGC	microsatellite	B4	90-110	Menotti-Raymond et al 1999
FCA069 R	AATTTAACGTTAGGCTTTTTGCC	microsatellite
FCA096 F	CACGCCAAACTCTATGCTGA	microsatellite	A2	100-120	Menotti-Raymond et al 1999
FCA096 R	CAATGTGCCGTCCAAGAAC	microsatellite
FCA113 F	TGGGACGTCATTGCTCCT	microsatellite	E1	140-150	Menotti-Raymond et al 1999
FCA113 R	CCCACATTGGGCATAGAAAT	microsatellite
FCA453 F	AATTCTGAGAACAAGCTGAGGG	microsatellite	A1	180-220	Menotti-Raymond et al 1999
FCA453 R	ATCCTCTATGGCAGGACTTTG	microsatellite
FCA031 F	GCCAGGGACCTTTAGTTAGATT	microsatellite	E3	220-240	Menotti-Raymond et al 1999
FCA031 R	GCCCTTGGAACTATTAAAACCA	microsatellite
FCA085 F	CTGTACATTTCTCTTCCCATTGC	microsatellite	A2	100-140	Menotti-Raymond et al 1999
FCA085 R	CCCCTACTGGGTGCACTG	microsatellite
